# Supplementary material for: Comprehensive analysis of full-length transcripts reveals novel splicing abnormalities and oncogenic transcripts in liver cancer
Source: PLoS Genet. 2022 Aug 4;18(8):e1010342. doi: 10.1371/journal.pgen.1010342 (PMC9380957; doi:10.1371/journal.pgen.1010342)
Supplement: S7 Data — (XLSX) [file pgen.1010342.s037.xlsx]

## Sheet: Sheet5
S7 Data. List of bi-directionally significantly expressed genes
Gene	Splicing variant	Variant ID	Log2(FC)	Log10(CPM)	FDR	DET specific
CLDN10	ENST00000299339.2	0	-4.61294	2.42882	6.359e-15	0
CLDN10	NM_006984.4	0	-4.65886	2.74706	1.11052e-14	0
PCLAF	ENST00000300035.8	0	3.17811	3.6539	5.8729e-14	0
LDHB	Novel exon combination	0	-3.0106	2.80108	3.65492e-13	0
AP1M2	ENST00000589348.1	0	5.44083	0.769436	1.42487e-12	0
SPX	NM_030572.3	0	3.41666	1.56997	1.31573e-11	0
DYNLT3	ENST00000378578.8	0	1.01935	5.44022	3.8235e-11	0
LDHB	Novel exon combination	1	-2.84071	1.48145	4.45097e-11	0
USO1	XM_006714396.3	0	-1.18031	4.02625	6.45176e-11	0
SCP2	NM_002979.4	0	-1.64899	7.45013	2.43049e-10	0
PDE4B	Novel exon combination	0	4.72288	0.290336	2.95237e-10	0
SCP2	ENST00000371514.7	0	-1.92384	5.32978	4.55631e-10	0
TMX3	Novel exon length	0	-3.05057	-0.122585	5.42507e-10	0
FANCC	XM_005251802.3	0	-3.3833	0.310994	5.42507e-10	1
EBNA1BP2	ENST00000474566.1	0	-2.01033	2.65491	1.85945e-09	0
SDCCAG8	ENST00000497459.1	0	-3.95041	-0.0295517	2.34443e-09	1
RPS24	ENST00000613865.5	0	1.42257	7.4149	4.13697e-09	0
CFDP1	Novel exon combination	0	-3.22931	1.4749	4.91511e-09	1
LDHB	Novel exon	0	4.76004	1.81671	6.70901e-09	0
AFMID	ENST00000409257.9	0	-1.5311	2.79982	7.10712e-09	1
AFMID	XM_011524337.2	0	1.39328	2.69755	9.96717e-09	1
EBNA1BP2	Novel exon	0	-1.76134	2.84264	9.97989e-09	0
KCNJ15	ENST00000613499.4	0	-3.29886	-0.561009	1.19173e-08	1
LRAT	NM_004744.4	0	-3.18412	-0.275885	1.23489e-08	0
SCP2	ENST00000407246.6	0	-1.62499	2.59612	1.46943e-08	0
PCLAF	ENST00000380258.6	0	2.14328	1.37409	1.90057e-08	0
SCP2	XM_017002046.1	0	0.857417	6.85852	2.09871e-08	0
USO1	NM_001290049.1	0	-0.880222	4.244	3.88302e-08	0
CHCHD6	Novel exon combination	0	-2.95216	0.00654427	4.36342e-08	1
TRPM8	ENST00000444298.5	0	-1.82489	1.87137	6.4251e-08	0
RPS24	ENST00000465692.2	0	1.28348	5.2379	6.5337e-08	0
CFDP1	Novel exon	0	3.23004	2.02581	6.93398e-08	1
LYRM5	ENST00000557540.6	0	-1.08541	3.37817	1.04323e-07	0
XRCC5	Novel exon combination	0	-2.62305	3.87222	1.09767e-07	0
EMP2	XM_006720864.3	0	-1.32232	4.66716	1.30552e-07	1
LYRM5	NM_001001660.2	0	-0.975616	6.94199	1.42684e-07	0
FN1	NM_001306130.1	0	-1.38312	6.65731	1.46084e-07	1
SCP2	NM_001193617.1	0	-1.74132	2.65224	1.57439e-07	0
CS	NM_004077.2	0	1.02021	4.91119	1.58668e-07	0
CFDP1	ENST00000570103.5	0	-1.06242	4.06822	2.07536e-07	1
WDR72	Novel exon length	0	-2.49235	1.06766	2.28358e-07	0
SCP2	ENST00000640998.1	0	-1.53598	2.5592	6.67841e-07	0
MID1	NM_001193277.1	0	-1.35694	1.87776	6.71913e-07	1
SCP2	XM_017002045.1	0	-1.48137	2.51841	7.88196e-07	0
WDR72	ENST00000396328.5	0	-2.09565	3.85818	1.07672e-06	0
APOL3	Novel exon combination	0	2.15493	0.208048	1.3202e-06	0
CYB561A3	ENST00000294072.8	0	0.986886	2.87606	1.46713e-06	0
APOL3	XM_006724325.2	0	1.58463	0.9945	1.79433e-06	0
INHBA	XM_017012175.1	0	-2.2733	1.99569	1.83947e-06	0
KCNJ15	XM_017028344.1	0	2.9724	-0.341419	1.86215e-06	1
LRAT	ENST00000507827.5	0	-2.78761	-0.480151	2.17722e-06	0
CLDN10	NM_182848.3	0	-2.83335	-0.0247684	2.48394e-06	0
MICU1	NM_001195518.1	0	0.780258	4.67104	2.52707e-06	1
SPINT2	ENST00000301244.11	0	-1.89286	1.76034	2.58583e-06	0
AP1M2	ENST00000590923.5	0	4.62842	4.43518	3.13734e-06	0
TOM1L1	ENST00000570371.5	0	0.690118	3.07034	3.13734e-06	1
CAPZA2	Novel exon	0	-2.1361	1.63697	3.23122e-06	0
USO1	NM_003715.3	0	0.959386	2.20231	3.26731e-06	0
KCNJ15	NM_002243.4	0	-2.97967	-0.508542	3.50358e-06	1
FAM35A	ENST00000298786.4	0	0.741717	4.11824	3.73382e-06	0
INHBA	Novel exon combination	1	-2.45394	0.263749	3.95017e-06	0
SCP2	ENST00000478631.6	0	-0.946618	4.65179	4.01476e-06	0
USO1	XM_006714397.3	0	1.40427	0.913133	4.43906e-06	0
AP1M2	NM_005498.4	0	-3.14258	0.0862897	5.84596e-06	0
ALG9	ENST00000527212.5	0	2.55852	-0.236845	5.87454e-06	0
CLDN10	XM_011521134.2	0	-2.92357	-0.532143	5.9008e-06	0
LPIN1	ENST00000487576.1	0	4.51509	-0.067447	6.37837e-06	1
AP1M2	ENST00000587069.5	0	3.45985	-0.261699	6.82074e-06	0
KCNJ15	XM_005260975.2	0	2.66629	-0.321017	6.85005e-06	1
MICU1	XM_005269386.2	0	-1.47104	4.70749	6.93405e-06	1
LARP7	ENST00000344442.9	0	-0.678461	2.96113	7.08649e-06	0
NDUFAF1	NM_016013.3	0	-0.681455	4.37512	7.45327e-06	0
XRCC5	ENST00000392133.7	0	0.465982	6.21206	7.58895e-06	0
MID1	ENST00000317552.8	0	1.19606	2.91368	8.46591e-06	1
SCP2	ENST00000435345.6	0	0.889144	2.44449	9.14081e-06	0
ST7	ENST00000393451.7	0	1.09492	1.56006	9.35527e-06	1
TRPM8	Novel exon combination	0	4.23739	-0.172355	1.42101e-05	0
ACP1	NM_004300.3	0	0.56494	6.61293	1.4301e-05	1
AFMID	XM_011524336.2	0	1.35575	1.07553	1.61673e-05	1
RARRES2	ENST00000467793.5	0	1.21941	1.16188	1.67237e-05	0
ACADSB	ENST00000368869.8	0	-1.15504	4.08012	1.74153e-05	0
TMX3	Novel exon length	2	-1.64711	0.628713	1.78324e-05	0
LYRM5	XM_005253320.4	0	-0.935639	3.04068	2.46849e-05	0
XRCC5	ENST00000392132.6	0	0.477075	6.55723	2.51443e-05	0
BANF1	Novel exon length	0	-0.923519	1.5268	2.51443e-05	0
CEACAM1	NM_001184813.1	0	1.39396	1.49723	2.74669e-05	1
ACP1	ENST00000442386.5	0	0.91675	1.61941	2.81401e-05	1
ANKRD29	Novel exon combination	0	-2.38028	-0.498458	2.85642e-05	1
LYRM5	XM_017018850.1	0	-0.946849	2.04282	2.95682e-05	0
LYRM5	XM_005253319.4	0	-0.8939	2.89054	3.14103e-05	0
ACP1	NR_024080.1	0	-0.770194	3.71424	3.33378e-05	1
SCHIP1	ENST00000482804.1	0	2.18669	-0.247281	3.41865e-05	1
ACSL5	ENST00000356116.5	0	1.22929	1.99154	3.78938e-05	0
RBMX	ENST00000320676.11	0	0.847765	2.79508	4.02582e-05	0
MICU1	NM_001195519.1	0	-1.3195	2.30198	4.04223e-05	1
EBNA1BP2	Novel exon combination	1	-1.70004	0.414964	4.11606e-05	0
NOP58	ENST00000478508.1	0	-0.763941	3.80292	4.54286e-05	1
GIMAP5	ENST00000358647.4	0	-0.956287	2.61614	4.88291e-05	0
ST7	ENST00000393443.5	0	-1.0221	1.51921	5.13406e-05	1
RARRES2	ENST00000466675.5	0	-0.740647	4.72278	5.15524e-05	0
MYLK	NM_053025.3	0	-0.863273	3.60945	5.44776e-05	1
RPS24	ENST00000647545.1	0	-0.589636	7.38745	5.71164e-05	0
FN1	NM_001306129.1	0	0.809875	5.95147	5.87037e-05	1
CYB561A3	NM_001161454.1	0	1.32138	1.02857	5.91972e-05	0
SYTL5	NM_138780.2	0	-2.19842	-0.5899	6.27285e-05	1
DYNLT3	Novel exon	0	-1.59739	1.58086	6.65774e-05	0
WARS	NM_213645.1	0	0.942144	2.11739	6.74282e-05	1
WARS	Novel exon length	0	-1.5966	0.974742	6.9248e-05	1
GIMAP5	NM_018384.4	0	-0.918078	2.21815	6.99635e-05	0
BANF1	ENST00000312175.6	0	0.462911	6.87944	7.26362e-05	0
KRT8	ENST00000552551.5	0	-1.06354	2.85732	7.39e-05	1
GIMAP5	ENST00000493304.2	0	2.44117	1.04505	8.84397e-05	0
INHBA	Novel exon combination	0	-2.20517	-0.123765	0.000111639	0
DGUOK	NR_134895.1	0	0.753172	3.18253	0.000127808	1
EBNA1BP2	Novel exon combination	2	-1.98213	0.0371875	0.000134638	0
SNRPA1	NM_003090.3	0	0.761969	2.86302	0.000137858	1
IFT172	ENST00000359466.10	0	2.11961	-0.661905	0.000141159	1
TCAIM	NM_001282914.1	0	-0.834391	3.40354	0.000141396	1
KRT8	ENST00000619952.2	0	0.786806	2.92628	0.000141911	1
CS	ENST00000548567.5	0	0.557411	4.15069	0.000149564	0
RBMX	Novel exon length	0	0.869732	2.75103	0.000156142	0
NOP58	NM_015934.4	0	0.583765	4.21869	0.000158543	1
PKIB	Novel exon combination	1	2.79619	-0.295278	0.000180498	1
TCAIM	ENST00000383746.7	0	1.07242	1.46669	0.000187447	1
CYSTM1	ENST00000261811.5	0	0.627119	7.67985	0.000188877	0
ACSL5	NM_203380.1	0	-0.96065	4.93772	0.000213824	0
ACSL5	ENST00000354655.8	0	-1.37104	6.74409	0.000216502	0
LARP7	ENST00000509622.5	0	-0.712051	1.93074	0.00022323	0
CYB561A3	NM_001300763.1	0	-1.11146	1.51875	0.000223276	0
KRT8	NR_045962.1	0	-1.28666	0.595008	0.000229068	1
SNRPA1	NR_135508.1	0	-1.03928	0.926371	0.000232025	1
INHBA	XM_017012176.1	0	-1.48183	1.76707	0.000232144	0
ALG9	XM_017018325.1	0	-0.64392	3.26209	0.000244004	0
CLDN10	XM_017020843.1	0	-2.25445	-0.297494	0.000247029	0
KRT8	ENST00000546583.5	0	-1.01545	1.71196	0.000253966	1
SPX	NR_135188.1	0	2.37467	-0.697792	0.00026407	0
BANF1	NM_001143985.1	0	0.559946	3.91445	0.000264091	0
CHCHD6	ENST00000510044.1	0	1.84762	0.480767	0.000356959	1
PKIB	ENST00000368452.6	0	2.25034	0.00866363	0.000386356	1
INHBA	ENST00000242208.4	0	1.73123	1.2889	0.000399232	0
CEACAM1	XM_011527206.1	0	-0.768104	2.85736	0.000444069	1
RARRES2	ENST00000478771.2	0	-0.691677	3.5166	0.00047553	0
AFMID	Novel exon combination	0	0.564076	3.92754	0.000494104	1
WDR72	ENST00000567224.1	0	2.8087	0.282821	0.000554799	0
LARP7	NM_016648.3	0	-0.475405	3.96908	0.000556447	0
PCLAF	ENST00000560234.1	0	-1.54864	-0.0896316	0.000557738	0
AIG1	ENST00000494282.6	0	-0.763413	2.85661	0.000573346	1
FN1	NM_212474.2	0	-1.15027	5.8667	0.00060433	1
DGUOK	ENST00000264093.8	0	-0.496367	4.25262	0.000611647	1
ANKRD29	XR_935196.1	0	-1.70027	0.329618	0.000624529	1
RARRES2	NM_002889.3	0	-0.542716	5.18739	0.000635313	0
CAPZA2	ENST00000361183.7	0	0.428057	5.64929	0.000646012	0
CAPZA2	NM_006136.2	0	0.48794	7.0381	0.000665958	0
GIMAP5	ENST00000498181.6	0	-0.810709	2.74361	0.00071263	0
WDPCP	ENST00000490935.5	0	1.97403	1.56611	0.000720591	1
RBMX	NM_002139.3	0	0.46545	6.03593	0.000736247	0
IST1	NM_001270975.1	0	0.500541	4.63277	0.000750833	0
APOL3	NM_145639.1	0	-0.814701	3.98122	0.000752192	0
TCAIM	ENST00000342649.8	0	-0.841662	3.35264	0.000788059	1
SPX	Novel exon length	0	-1.93901	-0.555854	0.000791949	0
SPINT2	ENST00000454580.7	0	-1.63753	-0.120503	0.000828407	0
SYTL5	Novel exon	0	2.0246	0.0137173	0.000864919	1
MYLK	XM_011512860.2	0	-0.736977	1.93419	0.000870027	1
C7orf55	ENST00000297534.6	0	-0.555379	7.03991	0.000927626	0
KRT8	ENST00000551318.1	0	0.815115	1.74831	0.00101494	1
CASP8	Novel exon combination	0	-1.43182	0.328856	0.00102099	0
EXOC7	NM_001145298.3	0	-0.955406	1.49861	0.00105378	1
LPIN1	ENST00000256720.6	0	-0.666545	2.05835	0.00112931	1
TRIM74	Novel exon length	0	1.00672	1.5516	0.00113191	1
WDPCP	Novel exon combination	1	-1.33761	-0.210587	0.0011688	1
FAM35A	XM_011539881.2	0	-0.860813	0.709552	0.00117314	0
SCGN	XM_017010181.1	0	1.80688	3.01195	0.00122424	1
PDE4B	ENST00000371045.9	0	-1.15689	2.56317	0.00123337	0
ARFGAP2	XM_005253168.2	0	-1.17401	1.49563	0.00138946	1
USO1	ENST00000514213.6	0	1.18786	0.453566	0.00139509	0
CRYAB	ENST00000527950.5	0	1.425	0.489843	0.00143079	1
SPTLC1	Novel exon combination	0	-0.695834	1.91232	0.00143996	1
PKIB	Novel exon combination	0	2.3336	-0.596414	0.00151773	1
ACADSB	Novel exon length	0	0.956983	2.54505	0.00157616	0
DGUOK	Novel exon combination	0	1.0221	0.793118	0.00167533	1
ACP1	ENST00000453390.5	0	-0.476623	4.05419	0.00168754	1
SPTLC1	NM_006415.3	0	0.518331	4.31028	0.00168815	1
PDE4B	ENST00000341517.8	0	-1.01804	1.22073	0.00169215	0
FANCC	ENST00000433644.2	0	2.03366	-0.678635	0.001729	1
LOC100506127	NM_001305225.1	0	1.33266	0.188963	0.00174506	1
NDUFAF1	XM_011521659.2	0	-0.624687	1.56782	0.00174802	0
SDCCAG8	ENST00000366541.7	0	1.04161	0.425229	0.00198312	1
CASP8	Novel exon combination	2	0.721662	1.69106	0.00206993	0																						38
SPINT2	Novel exon combination	0	1.82503	-0.826419	0.00207578	0
ASB4	ENST00000428113.5	0	2.23821	-0.725119	0.00211086	1
MYLK	ENST00000360772.7	0	-0.717464	2.98824	0.00227703	1
TRMT10A	XM_006714417.2	0	-0.809194	2.08158	0.00235923	1
SPINT2	ENST00000587090.5	0	-1.41364	0.21978	0.00238092	0
CRYAB	NM_001885.2	0	-1.0407	2.03898	0.00239549	1
TRIM74	XR_001744738.1	0	0.606548	4.3617	0.00259844	1
WDPCP	ENST00000467687.1	0	2.22812	-0.376025	0.00260739	1
PKIB	NM_181795.2	0	1.90742	0.293458	0.00273918	1
CYSTM1	ENST00000644078.1	0	-0.667158	1.94543	0.00284428	0
PDE4B	XM_005270925.2	0	-1.04803	1.73589	0.00286952	0
ASB4	ENST00000325885.5	0	2.37379	-0.366345	0.00290369	1
LDHB	ENST00000396076.5	0	-0.591512	3.18803	0.00307044	0
SPX	ENST00000544637.5	0	2.38043	-0.802152	0.00307284	0
ACSL5	NM_016234.3	0	0.771272	2.37611	0.00318454	0
SCHIP1	NM_014575.3	0	-0.771977	1.39543	0.00322428	1
TRIM74	XR_001744746.1	0	-0.813913	1.02966	0.00325196	1
TMX3	Novel exon length	3	-1.33137	-0.08319	0.00331605	0
EXOC7	NM_015219.4	0	0.591555	2.76851	0.00337017	1
SLC22A25	XR_001747863.1	0	1.90872	0.366514	0.00338648	1
SLC22A25	XM_017017685.1	0	-1.18496	2.57069	0.00344964	1
ST7	Novel exon combination	0	1.30585	0.215514	0.00346177	1
SCGN	Novel exon	0	2.00149	0.373919	0.00353972	1
LRAT	XR_938793.2	0	1.96786	-0.741892	0.00357743	0
NEDD4L	NM_001144966.2	0	-1.68428	0.470067	0.00362309	1
ACADSB	NM_001609.3	0	-0.857482	8.6119	0.00364619	0
PKIB	Novel exon combination	2	2.31968	-0.798824	0.00377157	1
MID1	NM_033289.1	0	1.39296	-0.0771101	0.00377316	1
TOM1L1	Novel exon combination	0	-0.743032	1.03552	0.00379354	1
NEDD4L	ENST00000586263.5	0	1.06058	0.331147	0.00383705	1
CRYAB	NM_001289807.1	0	-1.0799	0.595397	0.0038465	1
ST7	ENST00000393447.8	0	-0.631856	2.24662	0.00422054	1
CASP8	ENST00000490682.5	0	0.642092	2.50198	0.00427458	0
EBNA1BP2	Novel exon combination	0	-1.38812	0.150337	0.00428445	0
WDR72	NR_102336.1	0	1.92695	-0.0603533	0.0043727	0
MID1	XM_006724492.3	0	0.566755	2.77929	0.00439468	1
CEACAM1	NM_001024912.2	0	-0.846474	6.11161	0.00442449	1
CASP8	NM_001228.4	0	0.985715	0.336296	0.00501255	0
PSTPIP2	XM_011526256.1	0	-1.18601	0.17586	0.00503422	1
EBNA1BP2	Novel exon combination	3	-1.18063	2.39137	0.00506114	0
CS	Novel exon length	0	-0.542966	2.09178	0.00515784	0
CEACAM1	ENST00000161559.10	0	0.491053	5.40688	0.00519084	1
FN1	NM_001306131.1	0	0.588435	7.56318	0.00544708	1
CYSTM1	ENST00000509589.5	0	-0.741351	2.61294	0.00550528	0
SCGN	NM_006998.3	0	-1.17926	2.31533	0.00567567	1
PKIB	XM_011535937.2	0	-1.39169	0.111808	0.00568026	1
EBNA1BP2	NM_006824.2	0	0.567147	2.68932	0.00581618	0
WDPCP	Novel exon	0	2.38034	0.23417	0.00586838	1
C7orf55	NR_073059.1	0	0.830199	0.938104	0.00592945	0
EID1	NM_014335.2	0	-0.344811	4.04	0.00593659	0
RBMX	Novel exon combination	1	-0.429598	3.23173	0.00611529	0
DYNLT3	ENST00000378581.7	0	0.756938	1.06092	0.00615736	0
TRMT10A	NM_001134665.2	0	0.574773	1.88274	0.00630742	1
ANKRD29	XR_001753145.1	0	1.53613	-0.0961702	0.00634927	1
TRPM8	XM_017004891.1	0	-0.873325	2.47763	0.00640573	0
FN1	NM_001306132.1	0	-0.748338	6.61879	0.00663156	1
ASB4	Novel exon	0	-1.90825	-0.899599	0.00669262	1
APOL3	NM_145641.2	0	-0.768155	2.9502	0.00677476	0
PKIB	XM_011535930.2	0	2.00597	-0.611225	0.006787	1
IFT172	XM_006711987.1	0	-1.53434	-0.382807	0.00691481	1
EMP2	NM_001424.5	0	0.572312	5.98216	0.00692713	1
TMX3	ENST00000562706.5	0	1.12806	0.193908	0.00701014	0
MBNL1	ENST00000282486.10	0	0.497043	2.27287	0.00711396	1
IST1	Novel exon length	1	-0.467758	2.14776	0.00719952	0
NDUFAF1	XM_017022293.1	0	0.835657	0.747887	0.00729711	0
AIG1	Novel exon combination	0	0.700668	2.37703	0.00768082	1
LYRM5	ENST00000555151.5	0	0.768363	1.25361	0.00776668	0
MYLK	ENST00000418370.6	0	0.822019	3.39101	0.00779205	1
CLDN10	Novel exon	0	1.95225	-0.687691	0.00787719	0
LOC100506127	NR_130990.1	0	-1.36788	-0.379719	0.00790508	1
DGUOK	XR_244926.3	0	-0.851639	0.491685	0.00808799	1
MBNL1	XM_017006434.1	0	-0.676071	1.47106	0.00810031	1
KRT8	ENST00000549198.1	0	0.774049	0.407622	0.00831993	1
FAM35A	NM_019054.2	0	0.518502	2.60455	0.0084824	0
ANKRD29	XM_011525832.2	0	1.07962	0.813136	0.00872554	1
AIG1	NM_016108.3	0	-0.509349	6.73146	0.008866	1
IST1	ENST00000378798.9	0	1.00685	0.426835	0.00937468	0
ARFGAP2	NM_032389.4	0	0.611098	2.55719	0.00937725	1
PSTPIP2	XM_011526253.2	0	1.2248	0.0935326	0.00941834	1
EID1	Novel exon length	0	1.16001	-0.217373	0.00971314	0
SYTL5	XM_017029973.1	0	-1.46791	-0.454382	0.00995602	1
LARP7	ENST00000324052.10	0	0.336677	3.83696	0.00997971	0
